# Supplementary material for: Identification of global regulators of T-helper cell lineage specification
Source: PubMed Central journal article supplement (PMC4654807; doi:10.1186/s13073-015-0237-0), 2015-11-20

SI Fig 2

A

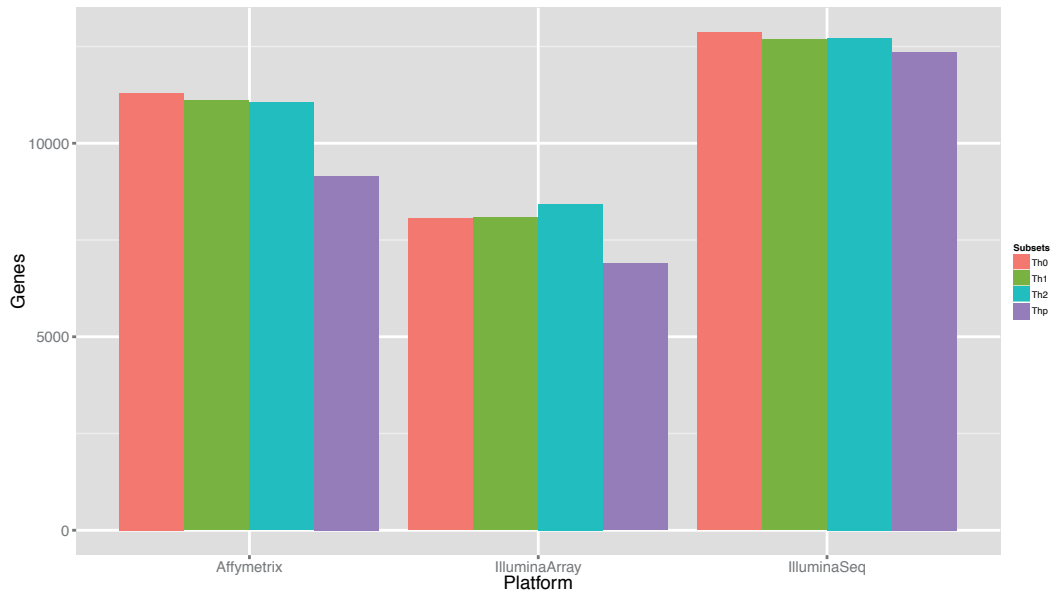

B

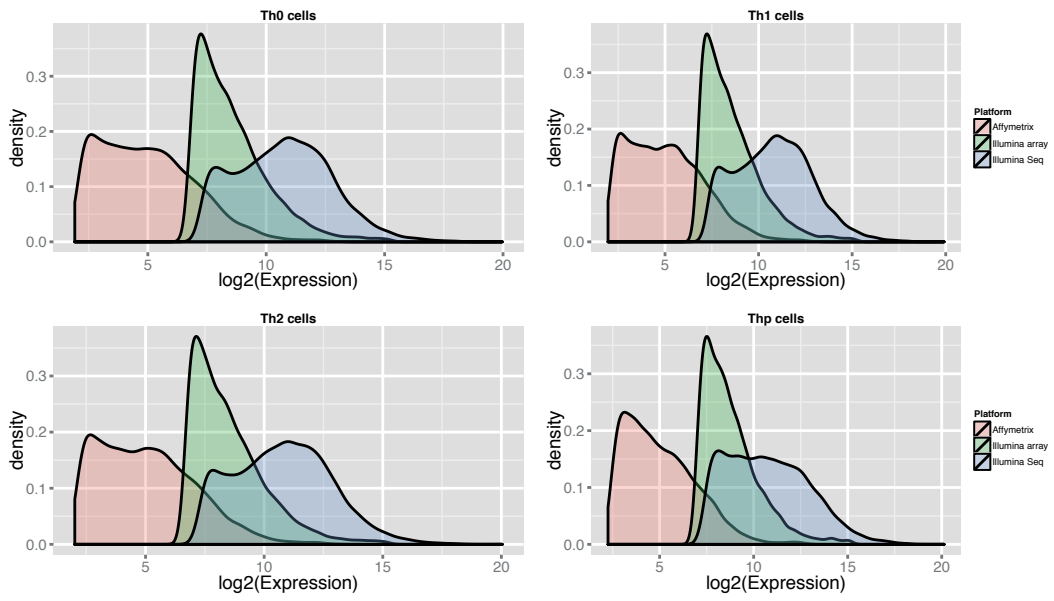

C

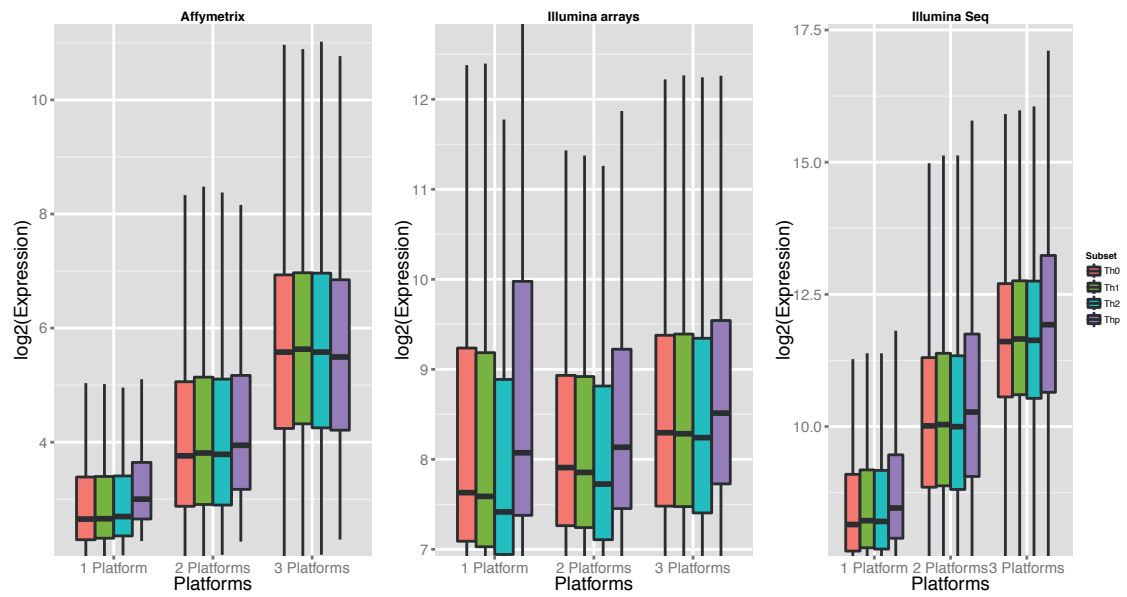

Supplement: 13073_2015_237_MOESM3_ESM.pdf [file 13073_2015_237_MOESM3_ESM.pdf]
